1  
2  
3  
Coarse, Medium or Fine?  
A Quantum Mechanics Approach to  
Single Species Population Dynamics

4 Olcay Akman<sup>1</sup>, Leon Arriola<sup>2,\*</sup>, Aditi Ghosh<sup>2</sup>, and Ryan Schroeder<sup>3</sup>

5 <sup>1</sup>Center for Collaborative Studies in Mathematical Biology, Illinois  
6 State University, USA: [oakman@ilstu.edu](mailto:oakman@ilstu.edu)

7 <sup>2</sup>Department of Mathematics, University of Wisconsin–Whitewater,  
8 Laurentide 2233, 800 West Main Street Whitewater, WI 53190-1790,  
9 USA: [arriolal@uww.edu](mailto:arriolal@uww.edu)

10 <sup>2</sup>Department of Mathematics, University of Wisconsin–Whitewater,  
11 USA: [ghosha@uww.edu](mailto:ghosha@uww.edu)

12 <sup>3</sup>Department of Mathematics, University of Connecticut, USA,  
13 [ryan.schroeder@uconn.edu](mailto:ryan.schroeder@uconn.edu)

14 Summer 2020

15 **Abstract**

16 Standard heuristic mathematical models of population dynamics are often constructed  
17 using ordinary differential equations (ODEs). These deterministic models yield pre-  
18 dictable results which allow researchers to make informed recommendations on public  
19 policy. A common immigration, natural death, and fission ODE model is derived from  
20 a quantum mechanics view. This macroscopic ODE predicts that there is only one  
21 stable equilibrium point  $\bar{\mu} = 1$ . We therefore presume that as  $t \rightarrow \infty$ , the expected  
22 value should be  $\mathbb{E}[\bar{\mu} = 1] = 1$ . The quantum framework presented here yields the  
23 same standard ODE model, however with very unexpected quantum results, namely  
24  $\mathbb{E}[\bar{\mu} = 0] = \mathbb{E}[\bar{\mu} = 1] \approx 0.37$ . The obvious questions are: why isn't  $\mathbb{E}[\bar{\mu} = 1] = 1$ ,  
25 why are the probabilities  $\approx 0.37$ , and where is the missing probability of 0.26? The  
26 answer lies in quantum tunneling of probabilities. The goal of this paper is to study  
27 these tunneling effects that give specific predictions of the uncertainty in the population  
28 at the macroscopic level. These quantum effects open the possibility of searching for  
29 "black–swan" events. In other words, using the more sophisticated quantum approach,  
30 we may be able to make quantitative statements about rare events that have significant  
31 ramifications to the dynamical system.

32 **Keywords**

33 Feynman diagrams, Logistic equation, Quantum/stochastic mechanics, Quantum tun-  
34 neling

35 **1 Motivation and introduction**

36 Standard temporal population models describe how population changes given the cur-  
37 rent status of the population. Environmental conditions such as limited resources, com-  
38 petition, disease, etc. affect changes in the population. Additionally, processes such as  
39 birth, death, immigration, and emigration affect changes to the age–size–distribution.  
40 These standard models are based on heuristic arguments. In other words, the models  
41 are based on the modeler carefully deciding which are the most important aspects of  
42 the system. Usually population balance equations are heuristically constructed in order  
43 to characterize those mechanisms/interactions that the modeler “thinks” are important  
44 to the model.

45 In 1838 Pierre–François Verhulst published a *Note on the law of population growth*  
46 [8].

47 “We know that the famous Malthus showed the principle that the human  
48 population tends to grow in a geometric progression so as to double after  
49 a certain period of time, for example every twenty five years. This propo-  
50 sition is beyond dispute if abstraction is made of the increasing difficulty  
51 to find food. . .

52 The virtual increase of the population is therefore limited by the size and  
53 the fertility of the country. As a result the population gets closer and closer  
54 to a steady state.”

55 Verhulst proposed the commonly accepted macroscopic ordinary differential equation

$$\frac{dP}{dt} = rP \left( 1 - \frac{P}{M} \right)$$

56 with specified initial condition  $P(0) = P_0$  and is commonly referred to as the logistic  
57 model. The basic assumption is that the population,  $P(t)$  at time  $t$ , is homogeneous  
58 and uniformly mixed. That is, interactions between any member of the population are  
59 equally likely. The heuristic assumptions are the processes of intrinsic birth at rate  $r$   
60 and limited resources via the carrying capacity  $M$  respectively.

61 In this paper, we also use the heuristic approach. However, the essential difference  
62 is that the mechanisms and interactions are formulated at the quantum level. For il-  
63 lustrative purposes, we will construct a quantum toy model where we assume the only  
64 important quantum interaction is competition as shown in Figure 1.

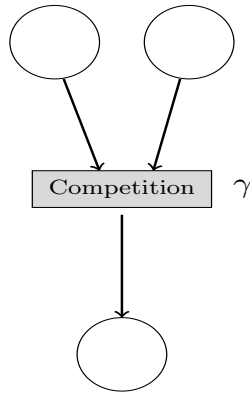

Figure 1: Competition With Rate  $\gamma$

65 We will define an appropriate Schrödinger equation for which we will find that the  
66 time dependent expected value  $\mu(t)$  of the "wave function" is governed by the logistic  
67 model

$$\frac{d\mu}{dt} = \gamma\mu(1 - \mu) - \gamma\sigma^2,$$

68 where  $\sigma^2$  denotes the variance of an underlying probability distribution of the popu-  
69 lation. Notice the quantum approach yields the familiar macroscopic logistic model  
70 with a time varying "harvesting" term  $\gamma\sigma^2$  that appears as noise. This effect initially  
71 seems to have no relation to assuming competition as the only mechanism of interaction  
72 within the population. The quantum approach suggests that the inevitable fluctuations  
73 of interactions within the population needs to be included in the standard heuristic  
74 macroscopic ODE models. It is also surprising that assuming only competition, the  
75 quantum approach yields a growth term  $\gamma\mu$ . From a macroscopic viewpoint, if the  
76 only interactions are decay processes, we would not expect growth to occur.

77 One major goal of this study is to establish an intimate connection between the  
78 principals of quantum/stochastic mechanics [2] and the foundations of single species  
79 population dynamics. Additionally, we provide a formal framework for a deeper un-  
80 derstanding of the underlying processes in single species population dynamics.

81 For instance, the noise that is predicted by the quantum approach adds a new feature  
82 which is not usually included in standard ODE models. Specifically, we propose that  
83 the quantum viewpoint validates, explains, and makes specific predictions about the  
84 quantum tunneling of probabilities.

85 Consider another toy quantum model where we assume that the only important  
86 quantum mechanisms are immigration, natural death and fission as shown in Figure 2.

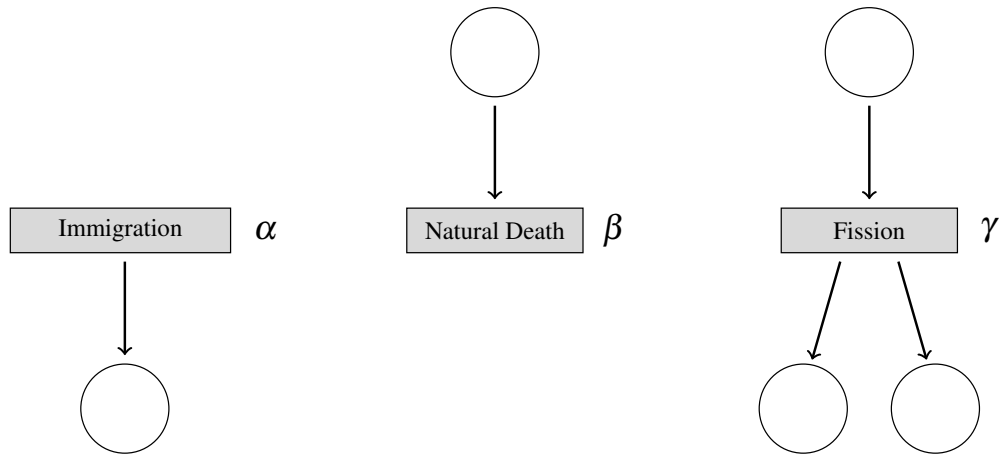

Figure 2: Immigration Birth ( $\alpha$ ), Natural Death ( $\beta$ ), Fission ( $\delta$ )

87 The quantum/stochastic mechanics approach will yield the specific Schrödinger equa-  
 88 tion

$$\frac{\partial \Phi}{\partial t} = \alpha(z-1)\Phi + (\beta(1-z) + \gamma(z^2-z)) \frac{\partial \Phi}{\partial z},$$

89 where the Markov generating function  $\Phi$  is defined as

$$\Phi(t, z) = \sum_{n=0}^{\infty} \phi_n(t) z^n.$$

90 This function describes the temporal probability  $\phi_n(t)$  of having exactly  $n$  objects at any  
 91 time  $t$ . The monomials  $z^n$  have no physical meaning and can be thought of as place-  
 92 holders. The expected value of  $\Phi$ , denoted by  $\mu(t) := \mathbb{E}[\Phi]$ , yields the the standard  
 93 macroscopic linear ODE model

$$\frac{d\mu}{dt} = (\gamma - \beta)\mu + \alpha,$$

94 with intrinsic growth rate  $\gamma - \beta$  and constant growth  $\alpha$ . This ODE has the non-negative  
 95 stable equilibrium  $\bar{\mu} = \frac{\alpha}{\beta - \gamma}$ , provided  $\beta > \gamma$ .

96 We will examine the very simple case where  $\alpha = \gamma = 1$  and  $\beta = 2$ , which yields  
 97 the stable equilibrium  $\bar{\mu} = 1$ . Let  $\phi_0(t)$  denote the probability of having exactly zero  
 98 objects at time  $t$ . Similarly,  $\phi_1(t)$  denotes the probability of having exactly one object  
 99 at time  $t$ ,  $\phi_{17}(t)$  denotes the probability of having exactly 17 objects at time  $t$ , etc.. The  
 100 standard macroscopic ODE model predicts that  $\mu(t \rightarrow \infty) = 1$ . This suggests that the  
 101 quantum approach should therefore predict that  $\phi_1(t \rightarrow \infty) = 1$  and  $\phi_j(t \rightarrow \infty) = 0$  for

102 all  $j \neq 1$ . The quantum approach predicts the very surprising and non-intuitive result

$$\begin{aligned}\phi_0(t \rightarrow \infty) &= \frac{1}{0!e} \approx 0.3679 \\ \phi_1(t \rightarrow \infty) &= \frac{1}{1!e} \approx 0.3679\end{aligned}$$

103 which does not sum to 1! The obvious question is: where is the missing probability  
104  $1 - 2/e$ ? Examining the higher order terms  $\phi_j(t \rightarrow \infty)$  for  $j \geq 2$  we find that

$$\begin{aligned}\phi_2(t \rightarrow \infty) &= \frac{1}{2!e} \approx 0.1839 \\ \phi_3(t \rightarrow \infty) &= \frac{1}{3!e} \approx 0.06131 \\ &\vdots \\ \phi_n(t \rightarrow \infty) &= \frac{1}{n!e}.\end{aligned}$$

105 Due to the sophistication of the quantum mechanics paradigm, this means that the  
106 probability of having 17 objects is not zero, however it will be very small.

107 This quantum tunneling effect of probabilities opens the possibility of searching for  
108 "black-swan" events. In other words, we may be able to make quantitative statements  
109 about rare events that have significant ramifications to the dynamical system. In future  
110 work, this framework will be extended to multiple species dynamics such as such as  
111 the predator-prey/Lotka-Volterra and the standard susceptible, infected, and recovered  
112 (SIR) epidemiological ODE models. The following section contains a short discussion  
113 of quantum physics concepts that are applicable to this work.

## 114 1.1 Quantum physics

115 One of the most profound paradigm shifts of the 20th century was the quantum theory  
116 of physics which was first developed by Bohr, Einstein, Planck, among others [5]. It  
117 became quite clear that the elementary processes of physics did not follow the com-  
118 monly accepted principles of classical mechanics. Prior to the quantum viewpoint, the  
119 prevailing notion was that the macroscopic description of nature could be described by  
120 an averaging process. As the results of key experiments such as the Youngs' double-  
121 slit experiment were analyzed, the accepted macroscopic viewpoint was shown to be  
122 completely inadequate in describing submicroscopic processes.

123 Most physical systems consist of an astronomical number of individual compo-  
124 nents along with a corresponding overwhelming number of interactions between the  
125 components. Many of the properties of the components often can have significant vari-  
126 ation about nominal values. If the modeler was to include all the interactions, a discrete  
127 agent model would result which we refer to as a fine scale model. The astronomical  
128 number of interactions could not be determined analytically, in which case the modeler  
129 would have to resort to computer simulation.

130 In chemistry, mathematical biology, mathematical epidemiology, population dy-  
131 namics and other related fields, master equations such as the logistics equation and  
132 predator–prey models such as the Lotka–Volterra ODEs, are constructed and used to  
133 describe the macroscopic behavior of the time evolution of the dynamical system and  
134 will be referred to as a coarse scale model.

135 These master equations are constructed by making simplified heuristic assumptions  
136 in order to define tractable deterministic models. However, these simplifications pre-  
137 clude prediction as well as a deeper understanding about what can occur at the quantum  
138 level. In this work we examine in depth the quantum processes as well as the subse-  
139 quent predictions made to the macroscopic realm—hence a medium scale model.

140 In the following section we present an a novel approach to address this problem by  
141 borrowing concepts of quantum physics.

## 142 1.2 Feynman diagrams

143 In order to motivate why we propose a quantum/stochastic mechanics approach to mod-  
144 eling processes, consider the Feynman diagram [7] depicting the interaction of an elec-  
145 tron with another electron in a perfectly elastic collision as shown in Figure 3.

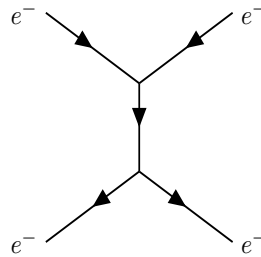

Figure 3: Feynman Diagram of Electron–Electron Interaction

146 The crucial elements of this diagram are

- 147 • objects enter a common location and undergo an interaction with each other and
- 148 • objects emerge from the common location after the interaction has occurred.

149 Consider the four fundamental forces of nature as depicted in the Feynman dia-  
150 grams as shown in Figure 4.

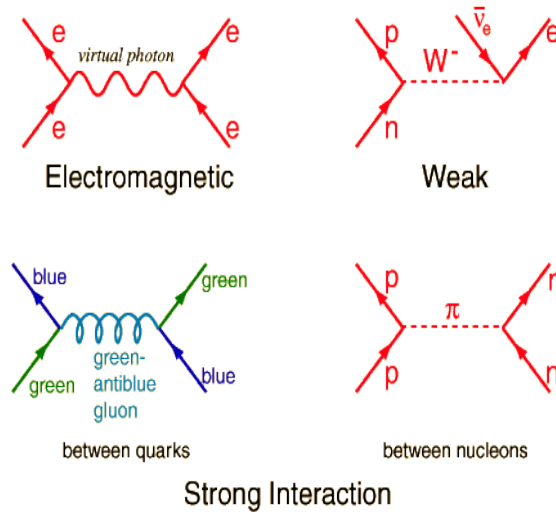

Figure 4: Feynman Diagram of Four Fundamental Forces

151 Notice that each graph depicts very complex interactions without the burdensome  
152 mathematical formalism. Feynman diagrams dramatically validate the old adage: "A  
153 picture is worth a thousand words."

154 Using the Feynman diagram paradigm, the tools and techniques from quantum  
155 physics can be used to describe and understand population dynamics. The beauty of the  
156 Feynman diagram approach is that very complex interactions can easily be visualized  
157 without the complicated mathematical machinery.

158 Although the focus of this study is single species population dynamics, it is instruc-  
159 tive to point out that future work will provide a natural extension to multiple species  
160 interactions such as susceptible or infected populations (SI), or the Lotka–Volterra  
161 predator–prey models. For example, consider the interaction between a susceptible  
162 and infectious person. Here we assume that the only two possibilities that can occur  
163 are the susceptible stays susceptible, or the susceptible becomes infected as seen in  
164 Figures 5 and 6, respectively.

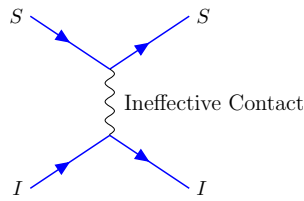

Figure 5: Unsuccessful Transmission of Pathogen

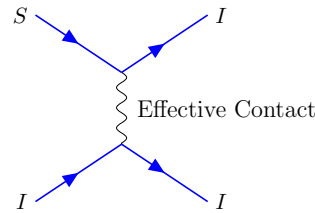

Figure 6: Successful Transmission of Pathogen

### 165 1.3 Memory-less vs memory processes

166 Dynamical systems, such as single species populations [1, 3, 4, 6], can evolve whereby  
167 the current state of the system has or has no memory of previous states of the sys-  
168 tem. For example, a Markov chain is an evolution through a sequence of transitions  
169 determined entirely by the roll of dice. Ignoring the possibility that the dice have the  
170 property of being quantum entangled, previous rolls of the dice cannot possibly affect  
171 future outcomes of the dice.

172 Card games such as blackjack and poker however do have a "memory" of previ-  
173 ous states. In fact, a seasoned card player uses this information to their advantage by  
174 remembering which cards have been exposed. Deductions can be made by regarding  
175 which cards remain in the deck. In the dynamical systems discussed in this paper, the  
176 transitions are assumed to be strictly determined by the roll of the dice. In other words,  
177 the past, present and future states are statistically independent via a stochastic Markov  
178 chain.

### 179 1.4 Quantum mechanics and population dynamics

180 In quantum mechanics the actors in the play are the creation operator  $a^+$  and the anni-  
181 hilation<sup>1</sup> operator  $a^-$ . The operator  $a^+$  takes an object from energy level  $\mathcal{E}_n$  and moves  
182 it up one level to  $\mathcal{E}_{n+1}$ . The operator  $a^-$  takes an object from energy level  $\mathcal{E}_n$  and moves  
183 it down one level to  $\mathcal{E}_{n-1}$ . Analogously, in population dynamics we define the creation  
184 operator  $a^+$  to take  $n$  objects and turn them into  $n + 1$  objects. The annihilation operator  
185  $a^-$  destroys one of the  $n$  objects into  $n - 1$  objects.

#### 186 1.4.1 Growth and the creation operator $a^+$

187 Consider the scenario where we initially have three objects  $A$ ,  $B$  and  $C$ , and then add  
188 one generic external object  $D$  as seen in Figure 7. Notice there is only one way of  
189 adding an additional generic object  $D$ . Now introduce a monomial  $z^3$  which represents  
190 the fact that initially there are exactly three objects. Please note that the independent  
191 variable  $z$  has no physical meaning. The only point of interest is the exponent 3 and

<sup>1</sup>For the physics community we use the symbol  $a^-$  instead of the commonly accepted notation  $a$ .



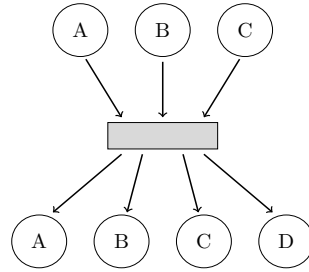

Figure 7:  $\{A, B, C\} \rightarrow \{A, B, C, D\}$

192 the coefficient of the monomial. In other words, we can think of the monomial  $z^3$  as  
 193 a placeholder. After the interaction has occurred, there are now exactly four objects,  
 194 which we associate with the monomial  $z^4$ . This means that the initial monomial  $z^3$   
 195 now becomes  $z^4$ . We assume that this holds true for any initial number of  $n$  objects, in  
 196 which case by induction the initial monomial  $z^n$  becomes  $z^{n+1}$ ,  $\forall n \in \mathbb{N}$ . The creation  
 197 operator  $a^+$  simply multiplies the monomial  $z^n$  by  $z$  yielding  $z^{n+1}$ . Hence we define the  
 198 action of the creation operator  $a^+$  to be

$$a^+ [z^n] := z^{n+1}, \quad (1)$$

199  $\forall n \in \mathbb{N}$ .

#### 200 1.4.2 Decay and the annihilation operator $a^-$

201 Now consider the reverse scenario where three objects interact, but now one object  
 202 is annihilated, resulting in two remaining objects. Since there are three ways for two  
 objects to remain in existence, as seen in Figure 8, we associate the action of  $a^-$  to

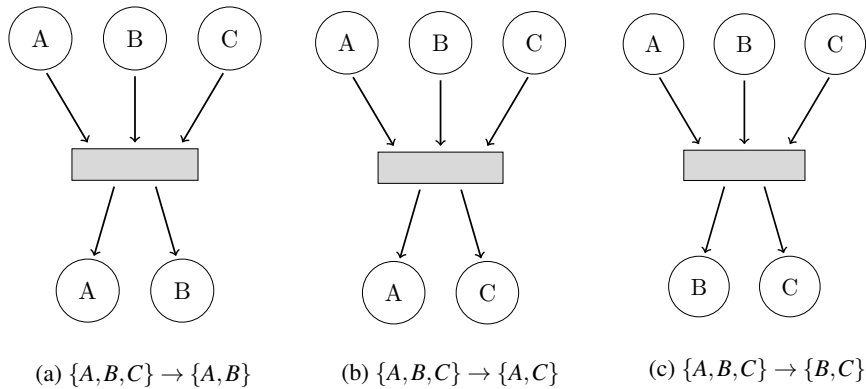

Figure 8: Eliminate One Object From  $\{A, B, C\}$

203

204 be  $a^- [z^3] = 3z^2$ . We assume this holds true for any non-negative integer number of  $n$   
 205 objects, the initial monomial  $z^n$  becomes  $nz^{n-1}$ , in which case the annihilation opera-  
 206 tor  $a^-$  is just the usual derivative operator  $\partial/\partial z$ . Hence, we define the action of the  
 207 annihilation operator  $a^-$  to be

$$a^- := \frac{\partial}{\partial z}, \quad (2)$$

208 and by induction define

$$(a^-)^n := \frac{\partial^n}{\partial z^n}, \quad (3)$$

209 where  $n \in \mathbb{N}$ . [2].

### 210 1.4.3 Combinatorial meaning of the operators $a^+$ and $a^-$

211 Consider the interaction where two objects interact sexually and produce a single off-  
 212 spring with rate  $\lambda$  as shown in Figure 9.

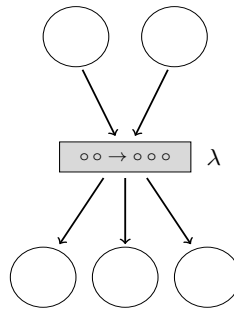

Figure 9: Sexual Reproduction with Rate  $\lambda$

213 In order to motivate how the number of ways that objects change from the input side  $j =$   
 214 2 as compared to the output side  $k = 3$  we discuss the formulation of the Hamiltonian  
 215 operator as found in [2]. A Hamiltonian operator can be thought of as a change in  
 216 energy, a change in probability flux, or in our situation, the change in the number of  
 217 ways that the input side does not change vs. the number of ways the output changes. To  
 218 simplify the idea to its most basic form, we casually define the Hamiltonian operator  
 219 as

$$\mathcal{H} := \text{''Final State''} - \text{''Initial State''}.$$

220 The expressions "Final State" and "Initial State" need to be appropriately defined.

221 For this example, consider the action of annihilating two objects on the input side,  
 222 followed by the action of creating two objects. In other words, the total number of  
 223 ways that two objects do not change is given by the composition of the operators

$$(a^+)^2 (a^-)^2 = z^2 \frac{\partial^2}{\partial z^2}.$$

224 In order to understand the combinatorial interpretation, consider the action of  $(a^+)^2 (a^-)^2$   
 225 on an arbitrary monomial such as  $z^5$ , that is

$$(a^+)^2 (a^-)^2 [z^5] = 5 \cdot 4 \cdot z^5.$$

226 The combinatorial interpretation is: How many ways can we annihilate 2 objects out of  
 227 5 objects ( $\partial^2/\partial z^2$ ) and then followed by bringing back 2 objects ( $z^2$ ). In other words,  
 228 this action is nothing more than the permutation  $P(5, 2)$ . Moreover, this means  $P(5, 2)$   
 229 is the total number of ways that nothing has changed, hence this is how we calculate  
 230 the number of ways the "Initial State" does not change.

231 Next, consider the action of  $(a^+)^3 (a^-)^2$  on an arbitrary monomial such as  $z^7$ , that  
 232 is

$$(a^+)^3 (a^-)^2 [z^7] = 7 \cdot 6 \cdot z^8.$$

233 The combinatorial interpretation is: How many ways can we annihilate 2 objects out of  
 234 7 objects ( $\partial^2/\partial z^2$ ) and then followed by bringing back 3 objects ( $z^3$ ). In other  
 235 words, this action is how we calculate the "Final State." The net change is defined as  
 236 the Hamiltonian operator

$$\mathcal{H} := (a^+)^3 (a^-)^2 - (a^+)^2 (a^-)^2.$$

237 In general, the scenario where  $j$  distinct objects enter into an interaction and  $k$   
 objects emerge is shown in Figure 10. We describe these type of processes where the

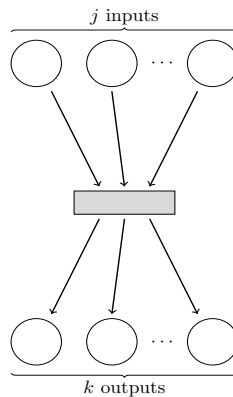

Figure 10:  $j$  Objects Enter into an Interaction &  $k$  Objects Emerge

238 net flux is quantified by the change in the number of the objects via the Hamiltonian  
 239 operator  $\mathcal{H} [ \underbrace{\circ \dots \circ}_{j \text{--inputs}} \rightarrow \underbrace{\circ \dots \circ}_{k \text{--outputs}} ]$ . Towards this goal, the linear operator  $\mathcal{H}$  will be  
 240 a modified Hamiltonian operator from quantum mechanics and will be composed of  
 241 suitably modified creation and annihilation operators as has been defined in [2].  
 242

243 Now that the Hamiltonian operator has been appropriately defined, the solution of  
 244 an associated Schrödinger equation will describe how the probability of having exactly  
 245  $n$  objects at time  $t$  evolves over time.

246  
 247 First, consider the input side of the interactions. We quantify the scenario where  
 248 all distinct input objects are annihilated followed by the action where all destroyed  
 249 objects are then recreated. In other words, we are counting the total number of ways  
 250 that the input configuration is unchanged. In general, if there are  $j$  objects in the initial  
 251 configuration then the action is given by

$$(a^+)^j (a^-)^j = z^j \frac{z^j}{\partial z^j}.$$

252 Next, examine the output configuration which is defined by annihilating  $j$  inputs  
 253 and then recreating  $k$  outputs. The action of this process is given by

$$(a^+)^k (a^-)^j = z^k \frac{z^j}{\partial z^j}.$$

254 The stochastic Hamiltonian is defined in [2] as the difference between the final and  
 255 initial configurations and is given by the stochastic Hamiltonian for the homogeneous  
 256 class of  $j$ -inputs and  $k$ -outputs as follows:

$$\mathcal{H}[j, k] := \lambda \left[ \overbrace{(a^+)^k}^{\text{Create } k \text{ outputs}} \circ \underbrace{(a^-)^j}_{\text{Annihilate } j \text{ inputs}} - \overbrace{(a^+)^j}^{\text{Create } j \text{ inputs}} \circ \underbrace{(a^-)^j}_{\text{Annihilate } j \text{ inputs}} \right]. \quad (4)$$

## 257 2 Quantum and stochastic mechanics

258 This section provides a short and self contained discussion of some of the tools of  
 259 quantum/stochastic mechanics. The basic object describing the evolution in time of the  
 260 probabilities of  $n$  distinct objects is the formal Markov generating function. Generating  
 261 functions (**GF**) acts as a conduit between discrete and continuous mathematics.

262 "A generating function is a clothesline on which we hang up a sequence  
 263 of numbers for display." [9]

264 The clothespins are the monomials  $z^n$  and the individual laundry items are the proba-  
 265 bilities  $\phi_n(t)$ . A GF is written as an infinite power series where the coefficients of the  
 266 monomials are the objects of interest. The monomials act as place holders and do not  
 267 have any physical role in the analysis.

## 268 2.1 Generating functions

269 An ordinary<sup>2</sup> generating function **GF** [9] is a formal power series of the form

$$\Phi(t, z) = \sum_{n=0}^{\infty} \phi_n(t) z^n, \quad (5)$$

270 where the coefficients  $\phi_n(t)$  may or may not have physical meanings. Generating func-  
 271 tions are extensively used in combinatorics, number theory, probability, and recurrence  
 272 relations. The formal variable  $z$  has no physical meaning; it is basically a place holder.  
 273 Additionally the analytic properties of the formal series  $\Phi(t, z)$  will not be considered<sup>3</sup>.

274 In quantum mechanics the GF is defined as

$$\Psi(t, z) = \sum_{n=0}^{\infty} \|\psi_n(t)\|^2 z^n,$$

275 where the coefficients  $\|\psi_n(t)\|^2$  represent the amplitude of the wave function. In  
 276 stochastic mechanics [2] the associated GF is defined in equation (5) where the density  
 277 functions  $0 \leq \phi_n(t) \leq 1$  represent the probability of having exactly  $n$  objects at time  $t$ .  
 278 Consider the special case where  $z = 1$ . In order to have a valid probability distribution,  
 279  $\Phi(t, z)$  must satisfy the constraint

$$\Phi(t, z) \Big|_{z=1} = \sum_{n=0}^{\infty} \phi_n(t) z^n \Big|_{z=1} \quad (6)$$

$$\begin{aligned} &= \sum_{n=0}^{\infty} \phi_n(t) \\ &= 1, \end{aligned} \quad (7)$$

280 in which case

$$\frac{\partial}{\partial t} [\Phi(t, z)] \Big|_{z=1} = 0. \quad (8)$$

281 The master equation for the GF is given by

$$\frac{\partial \Phi}{\partial t} = \mathcal{H} \circ \Phi,$$

282 where  $\mathcal{H}$  is the Hamiltonian operator associated with the interactions. The boundary  
 283 and initial conditions are

$$\Phi(t, z) \Big|_{z=1} = 1, \quad \frac{\partial \Phi(t, z)}{\partial t} \Big|_{z=1} = 0, \quad \text{and} \quad \Phi(t, z) \Big|_{t=0} = 1 \cdot z^{\mu_0},$$

284 where  $\mu_0 \in \mathbb{N}$  denotes the initial number of objects.

<sup>2</sup>In this paper we will not discuss other generating functions such as Dirichlet, exponential, etc., gener-  
 ating functions.

<sup>3</sup>The reason for ignoring whether the series is/is not convergent is that the manipulations that will be  
 performed are defined over the product topological ring of formal power series.

285 **2.2 Expected value–first moment/mean of an observable**

286 Recall that the expected value of a discrete probability distribution is given by

$$\mu = \sum \text{payoff} \times \text{probability}.$$

287 Suppose we are interested in the expected number of objects at time  $t$ . Consider the  
288 number operator defined as

$$\begin{aligned} \mathcal{N} &:= a^+ a^- \\ &= z \frac{\partial}{\partial z}. \end{aligned}$$

289 The reason it is called the number operator is that its action basically returns the number  
290 of objects as seen here

$$\begin{aligned} \mathcal{N} [z^k] &= z \frac{\partial}{\partial z} [z^k] \\ &= k z^k \\ (\mathcal{N} - k \mathbb{1}) z^k &= \mathbb{0}, \end{aligned}$$

291 in which case

$$\mathcal{N} = k \mathbb{1}.$$

292 Now consider the action of the number operator  $\mathcal{N}$  on the GF

$$\mathcal{N} \left[ \sum_{n=0}^{\infty} \phi_n(t) z^n \right] = \sum_{n=0}^{\infty} n \phi_n(t) z^n.$$

293 Next, define the expected number operator as

$$\mathbb{E}[\cdot] := z \frac{\partial}{\partial z} [\cdot] \Big|_{z=1}$$

294 and lastly define the first moment  $\mu(t)$  as

$$\mu(t) := \mathbb{E} [\Phi(t; z)] = \mathcal{N} \circ \Phi(t; z) \Big|_{z=1} = \sum_{n=0}^{\infty} n \phi_n(t). \quad (9)$$

295 The standard macroscopic ODEs describing population dynamics will be derived and  
296 be of the form

$$\frac{d\mu}{dt} = f(\mu).$$

297 This quantum approach will surprisingly yield standard models such as the logistic  
298 equation.

### 299 **2.3 Variance of an observable**

300 The variance is defined as

$$\begin{aligned} \sigma^2 &:= \mathbb{E}[\Phi^2] - \mathbb{E}[\Phi]^2 \\ &= N^2 [\Phi(t, z)] \Big|_{z=1} - [N\Phi(t, z)]^2 \Big|_{z=1} \\ &= \sum_{n=0}^{\infty} n^2 \phi_n(t) - \left( \sum_{n=0}^{\infty} n \phi_n(t) \right)^2 \end{aligned} \quad (10)$$

$$= \sum_{n=0}^{\infty} n^2 \phi_n(t) - \mu(t)^2. \quad (11)$$

301 Another surprising result of this quantum approach is that the variance will also ap-  
 302 pear in the macroscopic ODEs. The implication is that noise, due to fluctuations in  
 303 the interactions between members of the population, should also be included in the  
 304 macroscopic model.

### 305 **3 Immigration, natural death and fission**

306 Consider a single species population undergoing the parallel processes of immigration,  
 307 natural death, and fission as shown in Figure (11).

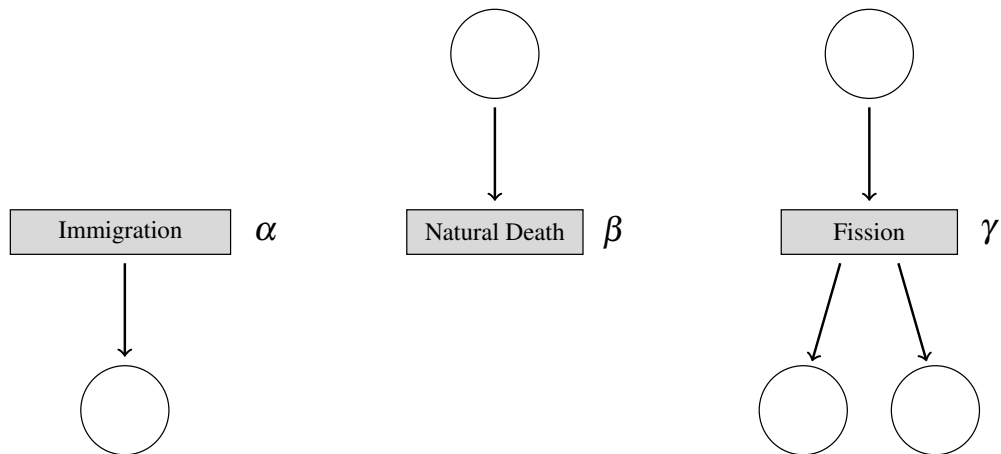

Figure 11: Immigration Birth ( $\alpha$ ), Natural Death ( $\beta$ ), Fission ( $\delta$ )

308 The parameters  $\alpha$ ,  $\beta$ , and  $\gamma$  are the rates (per unit time) at which each of these processes  
 309 occur respectively. The immigration process has the associated Hamiltonian

$$\alpha (a^+ (a^-)^0 - (a^+)^0 (a^-)^0) = \alpha (z - 1) \Phi,$$

310 the death process operator is

$$\beta ((a^+)^0 a^- - a^+ a^-) = \beta(1-z) \frac{\partial}{\partial z},$$

311 and the fission operator is

$$\gamma ((a^+)^2 a^- - a^+ a^-) = \gamma(z^2 - z) \frac{\partial}{\partial z}.$$

312 The associated master equation is given by

$$\frac{\partial \Phi}{\partial t} = \alpha(z-1)\Phi + (\beta(1-z) + \gamma(z^2 - z)) \frac{\partial \Phi}{\partial z}, \quad (12)$$

313 where  $\Phi(t, z)$  is the GF of this Markov process.

### 314 **3.1 Method of characteristics**

315 In order to use the method of characteristics [10], rewrite the master equation as

$$\frac{\partial \Phi}{\partial t} + (-\gamma z^2 + (\beta + \gamma)z - \beta) \frac{\partial \Phi}{\partial z} = \alpha(z-1)\Phi. \quad (13)$$

316 Assume that there exists differentiable parameterizations  $t = t(r, s)$  and  $z = z(r, s)$  such  
317 that

$$\frac{\partial t}{\partial s} = 1, \quad (14)$$

$$t(r, s=0) = 0, \quad (15)$$

$$\frac{\partial z}{\partial s} = -\gamma z^2 + (\beta + \gamma)z - \beta, \quad (16)$$

$$z(r, s=0) = r, \quad (17)$$

$$\frac{\partial \Phi}{\partial s} = \alpha(z-1)\Phi, \quad (18)$$

$$\Phi(r, s=0) = 1 \cdot r^{u_0}. \quad (19)$$

318 Integrating (14) and using the initial condition (15) yields  $t = s$ . Integrating (16) and  
319 using the initial condition (17) yields

$$r = \frac{\beta(z-1) + (\beta - \gamma z)e^{(\beta-\gamma)s}}{\gamma(z-1) + (\beta - \gamma z)e^{(\beta-\gamma)s}}, \quad \text{and} \quad z = \frac{(\beta - \gamma r) + \beta(r-1)e^{(\beta-\gamma)s}}{(\beta - \gamma r) + \gamma(r-1)e^{(\beta-\gamma)s}}.$$

320 Lastly, integrating (18) and using the initial condition (19) yields the closed form ex-  
321 pression

$$\Phi(t, z) = (\beta - \gamma)^{-\frac{\alpha}{\gamma}} \left[ \frac{\beta(z-1) + (\beta - \gamma z)e^{(\beta-\gamma)t}}{\gamma(z-1) + (\beta - \gamma z)e^{(\beta-\gamma)t}} \right]^{u_0} \left[ \frac{(\beta - \gamma)^2 e^{(\beta-\gamma)t}}{\gamma(z-1) + (\beta - \gamma z)e^{(\beta-\gamma)t}} \right]^{\frac{\alpha}{\gamma}}. \quad (20)$$

322

323 Using standard methods of analysis, it can be shown that the GF satisfies the essen-  
324 tial properties

$$\lim_{z \rightarrow 1} \Phi(t, z) = 1, \quad \text{and} \quad \lim_{t \rightarrow 0} \Phi(t, z) = 1 \cdot z^{u_0}$$

325 as well as the master equation given in equation (12).



### 326 **3.2 Expected value**

327 We now show that the quantum/stochastic paradigm predicts a familiar ODE model  
 328 found in population dynamics. We find that  $N\Phi$  is

$$z \frac{\left( \frac{e^{(\beta-\gamma)(\beta-\gamma z)+\beta(z-1)}}{e^{(\beta-\gamma)(\beta-\gamma z)+\gamma(z-1)}} \right)^{u_0} \left( \frac{(\beta-\gamma)e^{(\beta-\gamma)}}{e^{(\beta-\gamma)(\beta-\gamma z)+\gamma(z-1)}} \right)^{\alpha/\gamma} (u_0(\beta-\gamma)^2 e^{(\beta-\gamma)} + \alpha (e^{(\beta-\gamma)} - 1) (e^{(\beta-\gamma)(\beta-\gamma z)+\beta(z-1)}))}{(e^{(\beta-\gamma)(\beta-\gamma z)+\beta(z-1)}) (\gamma + e^{(\beta-\gamma)(\gamma z - \beta) + \gamma(z-z)})}$$

329 Evaluating at  $z = 1$  yields the expected value is

$$\mu(t) = \frac{\alpha - e^{t(\gamma-\beta)}(\alpha + u_0(\gamma - \beta))}{\beta - \gamma}, \quad (21)$$

330 with initial condition  $\mu(0) = u_0$ . Notice that the first moment  $\mu(t)$  satisfies the standard  
 331 ODE population model

$$\begin{aligned} \mu'(t) &= \alpha + \frac{(\gamma - \beta)e^{-t(\beta-\gamma)} \left( -\alpha + \alpha e^{t(\beta-\gamma)} + \beta u_0 - \gamma u_0 \right)}{\beta - \gamma} \\ &= (\gamma - \beta)\mu + \alpha. \end{aligned} \quad (22)$$

332 as found in single species population dynamics. The expression  $\gamma - \beta$  is a proxy for  
 333 the net growth rate.

### 334 **3.3 Second moment/variance of an observable**

335 The variance is given by

$$\sigma^2 := N^2 [\Phi(t, z)] \Big|_{z=1} - [N\Phi(t, z)]^2 \Big|_{z=1}.$$

336 which is in fact

$$\sigma^2 = \mu^2 - \mu$$

337 as expected.

### 338 **3.4 Quantum tunneling of probabilities**

339 We now discuss the implications of the quantum paradigm that cannot be deduced from  
 340 the macroscopic viewpoint as given by the standard single species population model  
 341 given in equation (22).

342 By expanding the explicit GF given in equation (20) the first two densities  $\phi_1(t)$   
 343 and  $\phi_2(t)$  are given by

$$\phi_0(t) := \left( \frac{(\beta - \gamma)e^{\beta t}}{\beta e^{\beta t} - \gamma e^{\gamma t}} \right)^{\frac{\alpha}{\gamma}} \left( \frac{\beta (e^{\beta t} - e^{\gamma t})}{\beta e^{\beta t} - \gamma e^{\gamma t}} \right)^{u_0},$$

344

$$\phi_1(t) := \frac{\left(\frac{(\beta-\gamma)e^{\beta t}}{\beta e^{\beta t} - \gamma e^{\gamma t}}\right)^{\alpha/\gamma} \left(\frac{\beta(e^{\beta t} - e^{\gamma t})}{\beta e^{\beta t} - \gamma e^{\gamma t}}\right)^{u_0-1} \left(\alpha\beta e^{2\gamma t} + \alpha\beta e^{2\beta t} + e^{t(\beta+\gamma)} (u_0(\beta-\gamma)^2 - 2\alpha\beta)\right)}{(\beta e^{\beta t} - \gamma e^{\gamma t})^2}.$$

345 Obviously these discrete density functions are extremely complicated. In order to il-  
 346 lustrate quantum tunneling of probabilities, we examine a special case. The above  
 347 standard ODE model predicts that a stable equilibrium point is given by

$$\bar{\mu} := \frac{\alpha}{\beta - \gamma},$$

348 provided  $\gamma < \beta$ . If we choose  $\alpha = \gamma = 1$ ,  $\beta = 2$ , and  $u_0 = 1$  then the equilibrium point  
 349  $\bar{\mu} = 1$  is stable and the GF reduces to the much simpler expression

$$\Phi(t, z) = \frac{e^t (e^t (2-z) + 2(z-1))}{(e^t (2-z) + z - 1)^2}. \quad (23)$$

350 The individual densities reduce to

$$\phi_0(t) = \frac{2e^t (e^t - 1)}{(2e^t - 1)^2} \quad (24)$$

$$\phi_1(t) = \frac{e^t (2e^{2t} - 3e^t + 2)}{(2e^t - 1)^3} \quad (25)$$

$$\phi_2(t) = \frac{2e^t (e^t - 1) (e^{2t} - e^t + 1)}{(2e^t - 1)^4} \quad (26)$$

$$\phi_3(t) = \frac{e^t (e^t - 1)^2 (2e^{2t} - e^t + 2)}{(2e^t - 1)^5} \quad (27)$$

$$\phi_4(t) = \frac{2e^t (e^t - 1)^3 (e^{2t} + 1)}{(2e^t - 1)^6} \quad (28)$$

$$\phi_5(t) = \frac{e^t (e^t - 1)^4 (2e^{2t} + e^t + 2)}{(2e^t - 1)^7} \quad (29)$$

$$\phi_6(t) = \frac{2e^t (e^t - 1)^5 (e^{2t} + e^t + 1)}{(2e^t - 1)^8} \quad (30)$$

$$\phi_7(t) = \frac{e^t (e^t - 1)^6 (3e^t + 2e^{2t} + 2)}{(2e^t - 1)^9} \quad (31)$$

⋮

351 The graphs of the first 6 densities are shown in Figure (12). Note that the probabilities  
 352 (as  $t \rightarrow \infty$ ) satisfy the decreasing monotonicity condition  $\phi_{j+1} \leq \phi_j$ .

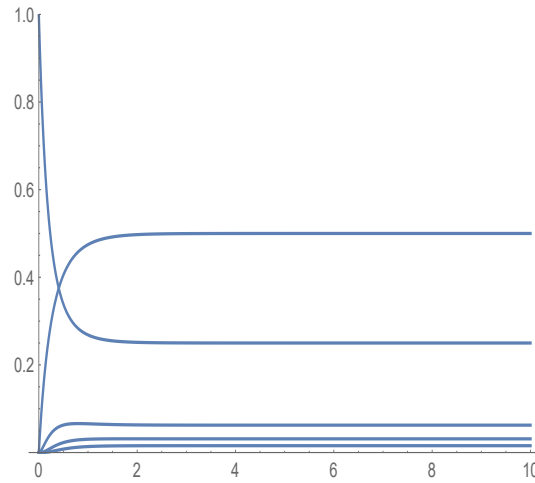

Figure 12:  $\phi_0, \dots, \phi_5$

353 In fact, numerically it can be shown that  $\lim_{t \rightarrow \infty} \phi_j(t) = (1/2)^{j+1}$  for  $j = 0, \dots, 17$ . Before  
 354 rigorously proving this observation, we pause and compare the prediction made by  
 355 the macroscopic model versus the quantum model. Specifically, if we start with one  
 356 object, the macroscopic ODE model predicts that as  $t \rightarrow \infty$  the stable equilibrium point  
 357 is  $\bar{\mu} = 1$ . The quantum model however predicts that as  $t \rightarrow \infty$  the probability of having  
 358 zero objects is  $\frac{1}{2}$ , the probability of having one object is  $\frac{1}{4}$ . By extension, the probability  
 359 of having 15 objects is  $\frac{1}{2^{16}}$ , small but not zero. The quantum model given in equation  
 360 (12) predicts a quantum tunneling effect of probabilities as a type of "noise" that is not  
 361 captured by the standard deterministic ODE model given in equation (22).

### 362 3.5 Long-term behavior of the individual probabilities

363 In order to rigorously prove the above observation, substitute the GF into equation (12)  
 364 with  $\alpha = \gamma = 1$ ,  $\beta = 2$ , and  $u_0 = 1$ . Collecting the coefficients of the monomials  $z^n$   
 365 yields the infinite system of first order ODE/difference equations

$$\begin{aligned}
 \phi_0'(t) &= -\phi_0(t) + 2\phi_1(t) \\
 \phi_1'(t) &= \phi_0(t) - 4\phi_1(t) + 4\phi_2(t) \\
 \phi_2'(t) &= 2\phi_1(t) - 7\phi_2(t) + 6\phi_3(t) \\
 \phi_3'(t) &= 3\phi_2(t) - 10\phi_3(t) + 8\phi_4(t) \\
 &\vdots \\
 \phi_{n+1}'(t) &= (n+1)\phi_n(t) - (3n+4)\phi_{n+1}(t) + (2n+4)\phi_{n+2}(t) \quad \text{for } n \geq 0.
 \end{aligned}$$

366 Since the GF can be written as  $\Phi(t, z) = \sum_{n=0}^{\infty} \phi_n(t) z^n$  and the  $\{\phi_n(t)\}$  is a valid prob-  
 367 ability distribution, then  $\sum_{n=0}^{\infty} \phi_n(t) = 1$  and so  $\sum_{n=0}^{\infty} \phi_n'(t) = 0$ . If a steady state exists

368 for each density function then  $\lim_{t \rightarrow \infty} \phi_j'(t) = 0$ . The infinite system of recurrence ODEs  
 369 reduces to the infinite system of difference equations

$$\begin{aligned} -\phi_0 + 2\phi_1 &= 0 \\ \phi_0 - 4\phi_1 + 4\phi_2 &= 0 \\ 2\phi_1 - 7\phi_2 + 6\phi_3 &= 0 \\ 3\phi_2 - 10\phi_3 + 8\phi_4 &= 0 \\ &\vdots \\ (n+1)\phi_n - (3n+4)\phi_{n+1} + (2n+4)\phi_{n+2} &= 0 \quad \text{for } n \geq 0. \end{aligned}$$

370 Using induction proves the desired result that  $\lim_{t \rightarrow \infty} \phi_j(t) = (1/2)^{j+1}$  for  $j \in \mathbb{N}$ .

## 371 4 ODE w/o closed form expression of $\Phi(t, z)$

372 If the number of inputs  $j \geq 2$  then the associated PDE is of order  $j \geq 2$ . In general,  
 373 PDEs of 2nd order or higher cannot be solved explicitly for  $\Phi(t, z)$ . In this short section  
 374 we show how to bypass having the explicit form of  $\Phi$ .

375 The first moment is defined as  $\mu(t) := \mathbb{E}[\Phi]$ , where

$$\mathbb{E}[\Phi] := z \frac{\partial \Phi}{\partial z} \Big|_{z=1} = \sum_{n=0}^{\infty} n \phi_n(t).$$

376 Differentiating  $\mu$

$$\begin{aligned} \frac{d\mu}{dt} &= \frac{d}{dt} \mathbb{E}[\Phi] \\ &= \mathbb{E} \left[ \frac{\partial \Phi}{\partial t} \right] \\ &= z \frac{\partial}{\partial z} [\mathcal{H} \circ \Phi] \Big|_{z=1}, \end{aligned}$$

377 in which case

$$\frac{d\mu}{dt} = z \frac{\partial}{\partial z} [\mathcal{H} \circ \Phi] \Big|_{z=1}. \quad (32)$$

## 378 5 Immigration, death, competition and fission

379 We now derive a logistic ODE for the processes of immigration (rate  $\alpha$ ), natural death  
 380 (rate  $\beta$ ), competition (rate  $\gamma$ ) and fission (rate  $\delta$ ). Since the Hamiltonian operator  $\mathcal{H}$   
 381 is a linear operator, we examine each of these processes individually and then add all  
 382 the individual ODEs to obtain the initial value problem

$$\frac{d\mu}{dt} = \underbrace{\alpha}_{\text{Immigration}} - \underbrace{\beta\mu}_{\text{Natural Death}} + \underbrace{\gamma\mu(1-\mu) - \gamma\sigma^2}_{\text{Competition}} + \underbrace{\delta\mu}_{\text{Fission}}, \quad (33)$$

383 where  $\sigma^2$  denotes the variance.

### 384 **5.1 Immigration**

385 Consider the process of immigration with rate  $\alpha$  as shown in Figure (13).

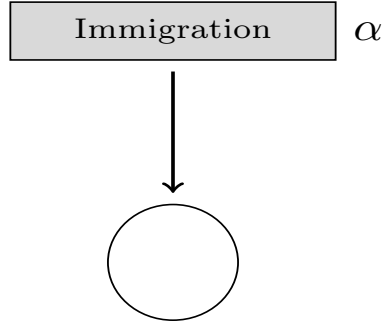

Figure 13: Immigration with rate  $\alpha$

386 The associated master equation is given by

$$\frac{\partial \Phi_{\mathbf{I}}}{\partial t} = \alpha(z-1)\Phi_{\mathbf{I}} \quad (34)$$

387 and using equation (32) we obtain the ODE

$$\begin{aligned} \frac{d\mu_{\mathbf{I}}}{dt} &= \alpha z \frac{\partial}{\partial z} \left[ (z-1) \sum_{n=0}^{\infty} \phi_n(t) z^n \right] \Big|_{z=1} \\ &= \alpha \left[ \sum_{n=0}^{\infty} (n+1) \phi_n(t) z^{n+1} - \sum_{n=0}^{\infty} n \phi_n(t) z^n \right] \Big|_{z=1} \\ &= \alpha \sum_{n=0}^{\infty} \phi_n(t), \end{aligned}$$

388 in which case

$$\frac{d\mu_{\mathbf{I}}}{dt} = \alpha. \quad (35)$$

### 389 **5.2 Natural death**

390 Now consider the natural death process, as shown in Figure (14)

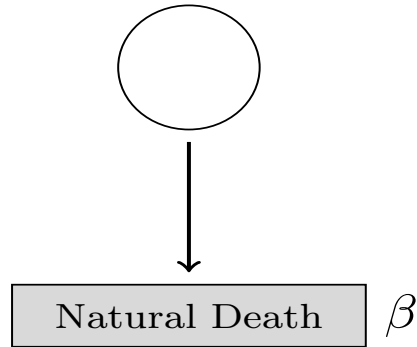

Figure 14: Natural Death With Rate  $\beta$

391 with the associated master equation

$$\frac{\partial \Phi_D}{\partial t} = \beta (1-z) \frac{\partial \Phi_D}{\partial z}.$$

392 The associated macroscopic ODE is given by

$$\begin{aligned} \frac{d\mu_D}{dt} &= \beta z \frac{\partial}{\partial z} \left[ (1-z) \sum_{n=0}^{\infty} n \phi_n(t) z^{n-1} \right] \Big|_{z=1} \\ &= \beta \left[ \sum_{n=0}^{\infty} n(n-1) \phi_n(t) z^{n-1} - \sum_{n=0}^{\infty} n^2 \phi_n(t) z^n \right] \Big|_{z=1} \\ &= -\beta \sum_{n=0}^{\infty} n \phi_n(t) \\ &= -\beta \mu, \end{aligned}$$

393 in which case

$$\frac{d\mu}{dt} = -\beta \mu. \tag{36}$$

### 394 5.3 Competition

395 Next, consider the competition interaction process as shown in Figure (15)

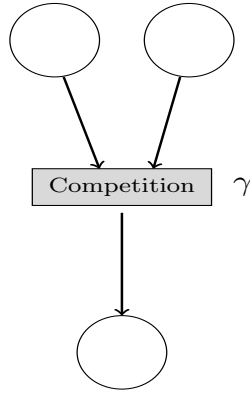

Figure 15: Competition With Rate  $\gamma$

396 with the associated master equation

$$\frac{\partial \Phi_C}{\partial t} = \gamma(z - z^2) \frac{\partial^2 \Phi_C}{\partial z^2}.$$

397 The macroscopic behavior is governed by the ODE

$$\begin{aligned} \frac{d\mu_C}{dt} &= \gamma z \frac{\partial}{\partial z} \left[ (z - z^2) \frac{\partial^2 \Phi_C}{\partial z^2} \right] \Big|_{z=1} \\ &= \gamma \left[ \sum_{n=0}^{\infty} n(n-1)^2 \phi_n(t) - \sum_{n=0}^{\infty} n^2(n-1) \phi_n(t) \right] \\ &= \gamma \mu_C (1 - \mu_C) - \gamma \sigma^2, \end{aligned}$$

398 which yields the macroscopic description of competition

$$\frac{d\mu_C}{dt} = \gamma \mu_C (1 - \mu_C) - \gamma \sigma^2. \quad (37)$$

399 Consider the logistic equation with time dependent harvesting

$$\frac{d\mu_C}{dt} = \underbrace{\gamma \mu_C}_{\text{Birth}} - \overbrace{\gamma \mu_C^2}^{\text{Competition}} - \underbrace{\gamma \sigma^2}_{\text{Harvesting}}.$$

400 It is very interesting to note that the quantum formalism for a strictly decay process,  
 401 namely competition, introduces two very unexpected terms in the macroscopic descrip-  
 402 tion. One would expect that there would not be any growth terms such as the intrinsic  
 403 birth expression  $\gamma \mu_C$ . Additionally, the quantum approach predicts a time dependent  
 404 harvesting term via the variance expression  $\gamma \sigma^2$ . In other words, the quantum approach  
 405 predicts that ad hoc birth and harvesting heuristic assumptions commonly included are  
 406 actually justified by way of the effect of the quantum tunneling of probabilities.

407 **5.4 Fission**

408 Lastly, consider the process of fission as shown in Figure (16)

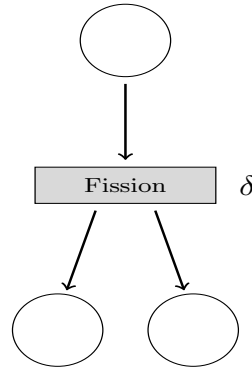

Figure 16: Fission With Rate  $\delta$

409 Using the same methods as above yields the macroscopic description

$$\frac{d\mu_F}{dt} = \delta\mu_F. \quad (38)$$

410 **5.5 Equilibrium points & stability**

411 Since each of the above Hamiltonian operators are linear, the macroscopic ODE is

$$\frac{d\mu}{dt} = \alpha - \beta\mu + \gamma\mu(1 - \mu) - \gamma\sigma^2 + \delta\mu.$$

412 In order to discuss the equilibrium points as well as the stability, define  $f(\bar{\mu})$ , where

$$f(\bar{\mu}) := \alpha - \beta\bar{\mu} + \gamma\bar{\mu}(1 - \bar{\mu}) - \gamma\sigma^2 + \delta\bar{\mu}. \quad (39)$$

413 The positive equilibrium point

$$\bar{\mu}_+ = \frac{(\gamma + \delta - \beta) + \sqrt{(\gamma + \delta - \beta)^2 + 4\gamma(\alpha - \gamma\sigma^2)}}{2\gamma} \quad (40)$$

414 is ensured to be real and non-negative provided

$$\gamma + \delta > \beta \quad \text{and} \quad \frac{\alpha}{\gamma} > \sigma^2.$$

415 In other words, in order for the equilibrium point to be real and non-negative the rates  
416 must satisfy the constraints

$$\text{Competition Rate} + \text{Fission Rate} > \text{Natural Death Rate} \quad \text{and} \quad \frac{\text{Immigration Rate}}{\text{Competition Rate}} > \text{Variance}.$$



417 Since

$$\begin{aligned} f'(\bar{\mu}_+) &= -2\gamma\bar{\mu}_+ + (\gamma + \delta - \beta) \\ &= -\sqrt{(\gamma + \delta - \beta)^2 + 4\gamma(\alpha - \gamma\sigma^2)} < 0, \end{aligned}$$

418 in which case  $\bar{\mu}_+$  is stable. The one weakness in this analysis is that we do not have  
419 any knowledge on the temporal behavior of the variance  $\sigma^2$ .

## 420 6 Concluding remarks

421 The quantum formalism, as defined in [2], is used to construct Schrödinger equations  
422 for single species population dynamics. The solution  $\Phi(t, z)$  is given as a Markov  
423 generating function which describes the probability  $\phi_n(t)$  of having exactly  $n$  objects at  
424 time  $t$ . These probabilities exhibit quantum tunneling effects which predict events that  
425 are not seen or even expected in the standard deterministic models. The expected value  
426 of the solution  $\Phi(t, z)$  yields similar deterministic models but with an additional noise  
427 term. This means that the quantum approach suggests that standard heuristic models  
428 lack one feature, namely noise. Furthermore, we have shown that the lone assumption  
429 of decay via competition results in the surprising result that a growth term occurs.

430 Future work will explore the use of these added features and may be helpful in  
431 predicting black–swan events. For example, consider a quantum model of HIV. Deter-  
432 ministic models, as they currently exist, do not allow the quantitative prediction of the  
433 possibility of a black–swan event such as an infected person actually surviving. This  
434 means that the quantum framework as discussed in this paper will need to be extended  
435 to multispecies interactions such as the standard SIR epidemiological model and the  
436 Lotka–Volterra predator–prey model. Additionally, we intend to explore the possibility  
437 of extending this framework to finite state automata with applications to gene regula-  
438 tory networks. These mutations are eventually expressed as mutations. Lastly, includ-  
439 ing spatial aspects would yield spatial–temporal PDE models as well as the extension  
440 to cellular automata.

## 441 References

- 442 [1] L. Allen, *An Introduction to Stochastic Processes with Applications to Biology*,  
443 CRC Press, 2011.
- 444 [2] J. Baez and J. Biamonte, *Quantum Techniques in Stochastic Mechanics*, World  
445 Scientific, 2018.
- 446 [3] F. Brauer and C. Castillo-Chavez, *Mathematical Models in Population Biology*  
447 *and Epidemiology*, Texts in Applied Mathematics, vol. 40, Springer, 2012.
- 448 [4] L. Edelstein-Keshet, *Mathematical Models in Biology*, Birkhauser Mathematics  
449 Series, McGraw Hill, 1988.

- 450 [5] Greenberger, Daniel, Hentschel, Klaus, Weinert, and Friedel, *Compendium of*  
451 *Quantum Physics Concepts, Experiments, History and Philosophy*, Springer-  
452 Verlag, 2009.
- 453 [6] D. Maki and M. Thompson, *Mathematical Models and Applications: With Em-*  
454 *phasis on the Social, Life, and Management Sciences*, Prentice-Hall, 1973.
- 455 [7] R. Mattuck, *A Guide to Feynman Diagrams in the Many-Body Problem: Second*  
456 *Edition*, Dover Books on Physics, Dover Publications, 1992.
- 457 [8] P. Verhulst, *Notice sur la loi que la population suit dans son accroissement*,  
458 vol. 10, Correspondance mathématique et physique, 1838.
- 459 [9] H. Wilf, *Generatingfunctionology*, Academic Press, 1990.
- 460 [10] D. Zwillinger, *Handbook of differential equations*, Academic Press, 1992.
